# Supplementary material
Source: publisher figshare collection journal article supplement (https://karger.figshare.com/articles/dataset/_/9928868)
Supplement: Supplementary file 1 [file 1]

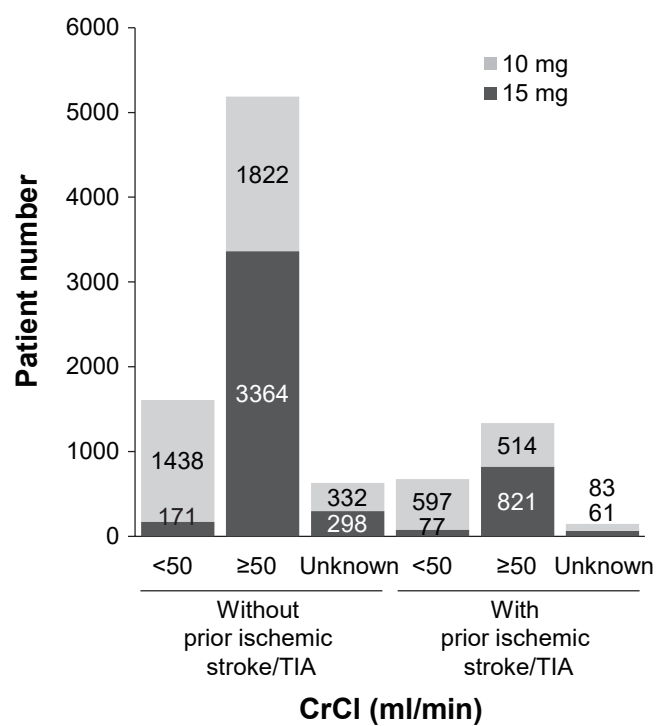

**Online Supplementary Fig. 1.** CrCl and dosing in patients with and without prior ischemic stroke/TIA. CrCl, creatinine clearance; TIA, transient ischemic attack.
